# Supplementary material for: Development of a predictive risk model for school readiness at age 3 years using the UK Millennium Cohort Study
Source: PubMed Central journal article supplement (PMC6596936; doi:10.1136/bmjopen-2018-024851), 2019-06-17
Supplement: bmjopen-2018-024851supp002.pdf [file bmjopen-2018-024851supp002.pdf]

**SUPPLEMENTARY FILE 2**

Table 1 - Adjusted associations for the predictor variables in model 1 (13 predictors) using multiple imputed data (n=11,879)

| Predictor                                                    | Adjusted OR (95% CI) | Weighting (rank) |
|--------------------------------------------------------------|----------------------|------------------|
| <b>GROUP 1 - DEMOGRAPHIC &amp; INDIVIDUAL FACTORS</b>        |                      |                  |
| <b>Gender</b>                                                |                      |                  |
| Female                                                       | 1                    | 8.5 (5)          |
| Male                                                         | 1.86 (1.62,2.14)     |                  |
| <b>Ethnicity</b>                                             |                      |                  |
| White                                                        | 1                    | 15.7 (3)         |
| Mixed                                                        | 1.04 (0.62,1.75)     |                  |
| Indian                                                       | 2.68 (1.85,3.89)     |                  |
| Pakistani and Bangladeshi                                    | 3.85 (2.94,5.04)     |                  |
| Black or Black British                                       | 2.31 (1.43,3.72)     |                  |
| Other ethnic group                                           | 3.95 (2.30,6.77)     |                  |
| <b>Mother's age at birth of first child</b>                  |                      |                  |
| 30-39                                                        | 1                    | 1.5 (12)         |
| 40+                                                          | 1.05 (0.67,1.64)     |                  |
| 20-29                                                        | 1.22 (0.99,1.51)     |                  |
| 14-19                                                        | 1.22 (0.93,1.59)     |                  |
| <b>Birth weight (&lt;2500grams)</b>                          |                      |                  |
| Normal/high                                                  | 1                    | 1.2 (13)         |
| Low birthweight                                              | 1.52 (1.18,1.97)     |                  |
| <b>Maternal Mental Health (Diagnosed depression/anxiety)</b> |                      |                  |
| No                                                           | 1                    | 1.5 (11)         |
| Yes                                                          | 1.15 (0.98,1.34)     |                  |
| <b>Child developmental milestones</b>                        |                      |                  |
| Developmental score                                          | 1.10 (1.07,1.13)     | 2.8 (10)         |
| <b>GROUP 2 - LIFESTYLE FACTORS</b>                           |                      |                  |
| <b>Duration of breastfeeding</b>                             |                      |                  |
| 6 months or more                                             | 1                    | 3.6 (9)          |
| 6 weeks - 6 months                                           | 1.17 (0.92,1.48)     |                  |
| One week or less                                             | 1.15 (0.90,1.48)     |                  |
| 1 - 6 weeks                                                  | 1.22 (0.96,1.57)     |                  |
| Never                                                        | 1.58 (1.29,1.95)     |                  |
| <b>GROUP 3 - SOCIAL &amp; COMMUNITY NETWORKS</b>             |                      |                  |
| <b>Number of children in family</b>                          |                      |                  |
| One child                                                    | 1                    | 7.1 (6)          |
| Two or three children                                        | 1.40 (1.19,1.63)     |                  |
| Four or more children                                        | 2.48 (1.94,3.16)     |                  |
| <b>GROUP 4 - LIVING &amp; WORKING CONDITIONS</b>             |                      |                  |
| <b>Maternal education</b>                                    |                      |                  |
| Degree plus                                                  | 1                    | 16.7 (2)         |

|                                                  |                                            |          |
|--------------------------------------------------|--------------------------------------------|----------|
| Diploma                                          | 0.88 (0.61,1.26)                           |          |
| A levels                                         | 1.13 (0.80,1.59)                           |          |
| GCSE A-C                                         | 1.34 (1.01,1.78)                           |          |
| GCSE D-G                                         | 1.72 (1.23,2.39)                           |          |
| None                                             | 1.74 (1.28,2.38)                           |          |
| <b>Workforce status</b>                          |                                            |          |
| Both parents in work                             | 1                                          |          |
| One parent in work                               | 0.94 (0.78,1.12)                           | 6.5 (7)  |
| Neither parent in work                           | 1.21 (0.93,1.57)                           |          |
| <b>Housing tenure</b>                            |                                            |          |
| Owner occupied                                   | 1                                          |          |
| Private rented                                   | 1.18 (0.90,1.54)                           | 5.5 (8)  |
| Social housing                                   | 1.43 (1.18,1.72)                           |          |
| Other                                            | 0.96 (0.69,1.35)                           |          |
| <b>GROUP 5 - SOCIOECONOMIC AND WIDER FACTORS</b> |                                            |          |
| <b>Social class</b>                              |                                            |          |
| Managerial & professional                        | 1                                          |          |
| Intermediate                                     | 0.98 (0.75,1.29)                           |          |
| Small employers & own account                    | 1.32 (0.87,2.00)                           | 17.6 (1) |
| Lower supervisory & technical                    | 1.50 (1.06,2.13)                           |          |
| Semi-routine & routine                           | 1.77 (1.38,2.27)                           |          |
| Never worked & long-term unemployed              | 2.19 (1.53,3.15)                           |          |
| <b>Annual income</b>                             |                                            |          |
| £33,000+                                         | 1                                          |          |
| £22,000-£33,000                                  | 1.33 (1.02,1.72)                           | 11.9 (4) |
| £11,000-£22,000                                  | 1.67 (1.30,2.14)                           |          |
| £0-£11,000                                       | 2.14 (1.60,2.87)                           |          |
| <b>ROC Analysis</b>                              | <b>AUROC = 0.79<br/>(95% CI 0.78,0.80)</b> |          |
