# Supplementary material for: Development of a predictive risk model for school readiness at age 3 years using the UK Millennium Cohort Study
Source: PubMed Central journal article supplement (PMC6596936; doi:10.1136/bmjopen-2018-024851), 2019-06-17
Supplement: bmjopen-2018-024851supp004.pdf [file bmjopen-2018-024851supp004.pdf]

## SUPPLEMENTARY FILE 4

Table 1 - Adjusted associations for the predictor variables in model 2 (6 predictors) using complete cases (n=11,146) and multiple imputed data (n=11,879). The weightings and rank are from dominance analysis of the complete case sample.

| Predictors                                            | Adjusted OR (95% CI) - complete case | Adjusted OR (95% CI) - multiple imputation | Weighting (rank) |
|-------------------------------------------------------|--------------------------------------|--------------------------------------------|------------------|
| <b>GROUP 1 - DEMOGRAPHIC &amp; INDIVIDUAL FACTORS</b> |                                      |                                            |                  |
| <b>Gender</b>                                         |                                      |                                            |                  |
| Female                                                | 1                                    | 1                                          | 9.9 (5)          |
| Male                                                  | 1.99 (1.72,2.31)                     | 1.93 (1.68,2.22)                           |                  |
| <b>Ethnicity</b>                                      |                                      |                                            |                  |
| White                                                 | 1                                    | 1                                          | 13.7 (4)         |
| Mixed                                                 | 1.2 (0.77,1.88)                      | 1.26 (0.83,1.90)                           |                  |
| Indian                                                | 1.64 (1.09,2.47)                     | 1.72 (1.14,2.59)                           |                  |
| Pakistani and Bangladeshi                             | 2.67 (2.10,3.41)                     | 2.71 (2.11,3.47)                           |                  |
| Black or Black British                                | 2.32 (1.52,3.54)                     | 2.69 (1.80,4.02)                           |                  |
| Other ethnic group                                    | 1.98 (1.10,3.58)                     | 2.06 (1.27,3.32)                           |                  |
| <b>GROUP 3 - SOCIAL &amp; COMMUNITY NETWORKS</b>      |                                      |                                            |                  |
| <b>Number of children in family</b>                   |                                      |                                            |                  |
| One child                                             | 1                                    | 1                                          | 9.5 (6)          |
| Two or three children                                 | 1.48 (1.27,1.73)                     | 1.45 (1.25,1.69)                           |                  |
| Four or more children                                 | 2.89 (2.23,3.75)                     | 2.62 (2.03,3.38)                           |                  |
| <b>GROUP 4 - LIVING &amp; WORKING CONDITIONS</b>      |                                      |                                            |                  |
| <b>Maternal education</b>                             |                                      |                                            |                  |
| Degree plus                                           | 1                                    | 1                                          | 20.5 (3)         |
| Diploma                                               | 0.87 (0.58,1.29)                     | 0.88 (0.60,1.28)                           |                  |
| A levels                                              | 1.05 (0.72,1.53)                     | 1.06 (0.74,1.52)                           |                  |
| GCSE A-C                                              | 1.43 (1.02,1.99)                     | 1.55 (1.14,2.12)                           |                  |
| GCSE D-G                                              | 1.78 (1.23,2.58)                     | 2.14 (1.51,3.03)                           |                  |
| None                                                  | 2.01 (1.44,2.81)                     | 2.42 (1.77,3.30)                           |                  |
| <b>GROUP 5 - SOCIOECONOMIC AND WIDER FACTORS</b>      |                                      |                                            |                  |
| <b>Social class</b>                                   |                                      |                                            |                  |
| Managerial & professional                             | 1                                    | 1                                          | 26.0 (1)         |
| Intermediate                                          | 1.17 (0.88,1.55)                     | 1.14 (0.86,1.51)                           |                  |
| Small employers & own account                         | 1.44 (0.91,2.28)                     | 1.52 (0.99,2.33)                           |                  |
| Lower supervisory & technical                         | 2.01 (1.42,2.86)                     | 1.92 (1.37,2.68)                           |                  |
| Semi-routine & routine                                | 2.41 (1.86,3.12)                     | 2.16 (1.68,2.78)                           |                  |
| Never worked & long-term unemployed                   | 3.34 (2.41,4.63)                     | 2.95 (2.14,4.07)                           |                  |
| <b>Annual income</b>                                  |                                      |                                            |                  |
| £33,000+                                              | 1                                    | 1                                          | 20.6 (2)         |
| £22,000-£33,000                                       | 1.33 (0.97,1.81)                     | 2.65 (2.01,3.50)                           |                  |
| £11,000-£22,000                                       | 1.88 (1.42,2.50)                     | 1.75 (1.32,2.31)                           |                  |
| £0-£11,000                                            | 2.98 (2.26,3.92)                     | 1.29 (0.95,1.75)                           |                  |

|                     |                                                         |                                                         |
|---------------------|---------------------------------------------------------|---------------------------------------------------------|
| <b>ROC Analysis</b> | <b>AUROC = 0.78</b><br>(95% CI 0.77 - 0.79)<br>n=11,146 | <b>AUROC = 0.78</b> (95%<br>CI 0.77 - 0.79)<br>n=11,879 |
|---------------------|---------------------------------------------------------|---------------------------------------------------------|
